# Supplementary material for: BatteryBERT: A Pretrained Language Model for Battery Database Enhancement
Source: PubMed Central journal article supplement (PMC9795558; doi:10.1021/acs.jcim.2c00035), 2022-05-09
Supplement: ci2c00035_si_001.pdf [file ci2c00035_si_001.pdf]

Supporting Information:  
BatteryBERT: A Pretrained Language Model  
for Battery Database Enhancement

Shu Huang<sup>†</sup> and Jacqueline M. Cole<sup>\*,†,‡</sup>

<sup>†</sup>*Cavendish Laboratory, Department of Physics, University of Cambridge, J.J. Thomson  
Avenue, Cambridge CB3 0HE, U.K.*

<sup>‡</sup>*ISIS Neutron and Muon Source, Rutherford Appleton Laboratory, Harwell Science and  
Innovation Campus, Didcot, Oxfordshire, OX11 0QX, UK.*

E-mail: [jmc61@cam.ac.uk](mailto:jmc61@cam.ac.uk)

# S1. Implementation Details

## 1.1 Language Model Pretraining

The language model pretraining followed the masked language modeling (MLM) objective and used the BertForPreTraining architecture (a multi-layer bidirectional transformer encoder) from transformers. The model sizes used were: L=12, H=768, A=12, Total parameters = 110M, where L is the number of layers, H is the hidden size, A is the number of self-attention heads. 15% of the tokens had been masked at random. We trained with a batch size 256 and a maximum sequence length of 512. We used Adam with a learning rate of 2e-5, for the further pretraining of BatteryBERT and BatterySciBERT; and a learning rate of 1e-4, for the pretraining of BatteryOnlyBert from scratch. BatteryBERT and BatterySciBERT were further pretrained for 1,000,000 steps, while BatteryOnlyBert was pretrained for 1,500,000 steps. The training time was 5 days for BatteryBERT and BatterySciBERT (further trained for 1,000,000 steps) and 7 days for BatteryOnlyBert (1,500,000 steps), using eight NVIDIA DGX A100 GPUs on the ThetaGPU cluster at the Argonne Leadership Computing Facility (ALCF).

The other configuration and training parameters were:

- attention\_probs\_dropout\_prob: 0.1
- hidden\_act: gelu
- hidden\_dropout\_prob: 0.1
- initializer\_range: 0.02
- intermediate\_size: 3072
- layer\_norm\_eps: 1e-12
- max\_position\_embeddings: 512

- position\_embedding\_type: absolute
- transformers\_version: 4.17.0.dev0
- no\_cuda: False
- n\_gpu: 8
- adam\_beta1=0.9
- adam\_beta2=0.999
- adam\_epsilon=1e-08
- L2\_weight\_decay=0.01
- vocab\_size: 28996 (cased), 30522(uncased)

## 1.2 Fine-tuning: Document Classification

In the fine-tuning stage, most model hyperparameters used were the same as in pretraining. The main differences were as follows. We used the "BertForSequenceClassification" as the model architecture. We used a dropout probability of 0.1 and optimize cross entropy using Adam. We fine-tuned 15 epochs using a batch size of 16 and 32, a learning rate of 2e-5, 3e-5 and 5e-5. The fine-tuning of document classification took around 1 hours on a single NVIDIA DGX A100 GPU.

## 1.3 Fine-tuning: Question Answering

Most of the model hyper-parameters used were the same as those employed in the pretraining and fine-tuning of document classification. We used the "BertForQuestionAnswering" as the model architecture in this step. We used a dropout probability of 0.1 and fine-tuned 4 epochs using a batch size of 16 and 32, a learning rate of 2e-5, 3e-5 and 5e-5. The fine-tuning of question answering took around 15 minutes on a single NVIDIA DGX A100 GPU.

## 1.4 Data Extraction

The document classifier and question-answering agent were combined with the traditional property data-extraction algorithm to create the battery database. For a subset of 10,000 papers, we used 10 nodes (CPUs) of ALCF Cooley systems with 3 sub-processes and it took 12 hours for the data extraction.

## S2. BatteryBERT Model Usage

It is easy to use the BatteryBERT models using the transformers library from Hugging Face. Examples are given below.

Example usage of the language model:

```
1 from transformers import AutoTokenizer, AutoModelForMaskedLM
2 model_name = "batterydata/batterybert-cased"
3 tokenizer = AutoTokenizer.from_pretrained(model_name)
4 model = AutoModelForMaskedLM.from_pretrained(model_name)
```

Example usage of the document classification model:

```
1 from transformers import AutoTokenizer, AutoModelForSequenceClassification
2 class_model_name = "batterydata/batteryscibert-uncased-abstract"
3 tokenizer = AutoTokenizer.from_pretrained(class_model_name)
4 model = AutoModelForSequenceClassification.from_pretrained(
    class_model_name)
```

Example usage of the Q&A model:

```
1 from transformers import AutoTokenizer, AutoModelForQuestionAnswering
2 qa_model_name = "batterydata/batterybert-cased-squad-v1"
3 tokenizer = AutoTokenizer.from_pretrained(qa_model_name)
4 model = AutoModelForQuestionAnswering.from_pretrained(qa_model_name)
```

All of the models can be found at <https://huggingface.co/batterydata/>.

### S3. Evaluation Details of the Paper Abstracts Data Set

|                         | <b>Accuracy<br/>(Batch Size 16;<br/>Learning Rate 2e-5)</b> | <b>Accuracy<br/>(Batch Size 16;<br/>Learning Rate 3e-5)</b> |
|-------------------------|-------------------------------------------------------------|-------------------------------------------------------------|
| Bert-base-uncased       | 96.61 Epoch 11                                              | 96.79 Epoch 11                                              |
| BatteryBERT-uncased     | 96.95 Epoch 12                                              | 96.61 Epoch 8                                               |
| BatterySciBERT-uncased  | 96.85 Epoch 6                                               | 96.19 Epoch 13                                              |
| BatteryOnlyBert-uncased | 97.04 Epoch 14                                              | 97.18 Epoch 13                                              |
| Bert-base-cased         | 96.62 Epoch 10                                              | 96.74 Epoch 13                                              |
| BatteryBERT-cased       | 96.77 Epoch 10                                              | 96.45 Epoch 12                                              |
| BatterySciBERT-cased    | 96.83 Epoch 14                                              | 96.30 Epoch 12                                              |
| BatteryOnlyBert-cased   | 97.12 Epoch 11                                              | 96.89 Epoch 6                                               |
|                         | <b>Accuracy<br/>(Batch Size 32;<br/>Learning Rate 2e-5)</b> | <b>Accuracy<br/>(Batch Size 32;<br/>Learning Rate 3e-5)</b> |
| Bert-base-uncased       | 96.79 Epoch 13                                              | 96.70 Epoch 13                                              |
| BatteryBERT-uncased     | 97.10 Epoch 11                                              | 96.96 Epoch 7                                               |
| BatterySciBERT-uncased  | 97.12 Epoch 14                                              | 97.00 Epoch 13                                              |
| BatteryOnlyBert-uncased | 97.17 Epoch 11                                              | 97.12 Epoch 6                                               |
| Bert-base-cased         | 96.84 Epoch 15                                              | 96.53 Epoch 15                                              |
| BatteryBERT-cased       | 97.29 Epoch 11                                              | 96.98 Epoch 9                                               |
| BatterySciBERT-cased    | 97.06 Epoch 11                                              | 96.73 Epoch 13                                              |
| BatteryOnlyBert-cased   | 97.03 Epoch 14                                              | 97.19 Epoch 11                                              |
|                         | <b>Accuracy<br/>(Batch Size 16;<br/>Learning Rate 5e-5)</b> | <b>Accuracy<br/>(Batch Size 32;<br/>Learning Rate 5e-5)</b> |
| Bert-base-uncased       | 95.57 Epoch 13                                              | 96.54 Epoch 11                                              |
| BatteryBERT-uncased     | 95.65 Epoch 2                                               | 96.47 Epoch 2                                               |
| BatterySciBERT-uncased  | 95.00 Epoch 1                                               | 96.76 Epoch 13                                              |
| BatteryOnlyBert-uncased | 96.39 Epoch 1                                               | 96.67 Epoch 2                                               |
| Bert-base-cased         | 95.48 Epoch 15                                              | 96.58 Epoch 11                                              |
| BatteryBERT-cased       | 95.76 Epoch 1                                               | 96.25 Epoch 15                                              |
| BatterySciBERT-cased    | 95.35 Epoch 1                                               | 95.53 Epoch 2                                               |
| BatteryOnlyBert-cased   | 96.16 Epoch 1                                               | 96.91 Epoch 12                                              |

## S4. Evaluation Details of the SQuAD Data Set

|                         |    | <b>Batch Size 16; Learning Rate 2e-5</b> |                |                |                |
|-------------------------|----|------------------------------------------|----------------|----------------|----------------|
|                         |    | <b>Epoch 1</b>                           | <b>Epoch 2</b> | <b>Epoch 3</b> | <b>Epoch 4</b> |
| Bert-base-uncased       | EM | 78.77                                    | 80.1           | 80.4           | 80.11          |
|                         | F1 | 86.72                                    | 87.88          | 87.9           | 87.67          |
| BatteryBert-uncased     | EM | 78.98                                    | 80.12          | 80.58          | 80.23          |
|                         | F1 | 86.95                                    | 88             | 88.09          | 88.02          |
| BatterySciBert-uncased  | EM | 78.64                                    | 79.51          | 79.44          | 79.41          |
|                         | F1 | 86.71                                    | 87.38          | 87.36          | 87.35          |
| BatteryOnlyBert-uncased | EM | 77.87                                    | 79.53          | 79.24          | 78.88          |
|                         | F1 | 86.11                                    | 87.22          | 87.22          | 87.19          |
| Bert-base-cased         | EM | 79.37                                    | 80.94          | 80.78          | 80.81          |
|                         | F1 | 87.17                                    | 88.52          | 88.37          | 88.45          |
| BatteryBert-cased       | EM | 79.96                                    | 81.84          | 81.54          | 81.54          |
|                         | F1 | 87.68                                    | 89.05          | 88.99          | 89.16          |
| BatterySciBert-cased    | EM | 77.7                                     | 79.8           | 79.2           | 79.47          |
|                         | F1 | 86.11                                    | 87.27          | 87.15          | 87.44          |
| BatteryOnlyBert-cased   | EM | 77.44                                    | 79.43          | 79.61          | 79.4           |
|                         | F1 | 85.28                                    | 86.56          | 87.3           | 86.98          |
|                         |    | <b>Batch Size 16; Learning Rate 3e-5</b> |                |                |                |
|                         |    | <b>Epoch 1</b>                           | <b>Epoch 2</b> | <b>Epoch 3</b> | <b>Epoch 4</b> |
| Bert-base-uncased       | EM | 79.21                                    | 80.05          | 80.6           | 80.18          |
|                         | F1 | 87.23                                    | 87.93          | 88.18          | 87.98          |
| BatteryBert-uncased     | EM | 78.96                                    | 80.1           | 80.64          | 79.94          |
|                         | F1 | 87.13                                    | 88.1           | 88.13          | 87.87          |
| BatterySciBert-uncased  | EM | 78.07                                    | 78.92          | 79.78          | 79.28          |
|                         | F1 | 86.35                                    | 87.01          | 87.28          | 87.31          |
| BatteryOnlyBert-uncased | EM | 77.75                                    | 79.06          | 79.34          | 78.6           |
|                         | F1 | 85.9                                     | 86.95          | 87.22          | 86.99          |
| Bert-base-cased         | EM | 79.67                                    | 80.61          | 80.86          | 80.4           |
|                         | F1 | 87.28                                    | 88.17          | 88.39          | 88.31          |
| BatteryBert-cased       | EM | 79.71                                    | 81.42          | 81.2           | 81.45          |
|                         | F1 | 87.38                                    | 88.75          | 88.52          | 88.91          |
| BatterySciBert-cased    | EM | 77.33                                    | 79.26          | 79             | 79.25          |
|                         | F1 | 85.96                                    | 86.92          | 87.13          | 87.11          |
| BatteryOnlyBert-cased   | EM | 75.87                                    | 79.81          | 79.53          | 79.21          |
|                         | F1 | 84.36                                    | 87.01          | 86.97          | 86.91          |

|                         |    | <b>Batch Size 16; Learning Rate 5e-5</b> |                |                |                |
|-------------------------|----|------------------------------------------|----------------|----------------|----------------|
|                         |    | <b>Epoch 1</b>                           | <b>Epoch 2</b> | <b>Epoch 3</b> | <b>Epoch 4</b> |
| Bert-base-uncased       | EM | 78.82                                    | 79.43          | 80.05          | 79.04          |
|                         | F1 | 86.54                                    | 87.55          | 87.96          | 87.34          |
| BatteryBert-uncased     | EM | 78.12                                    | 78.93          | 80.02          | 79.8           |
|                         | F1 | 86.16                                    | 87.29          | 87.64          | 87.76          |
| BatterySciBert-uncased  | EM | 77.2                                     | 77.96          | 78.87          | 78.43          |
|                         | F1 | 85.49                                    | 86.34          | 86.79          | 86.79          |
| BatteryOnlyBert-uncased | EM | 76.98                                    | 77.91          | 78.15          | 77.79          |
|                         | F1 | 85.22                                    | 85.96          | 86.39          | 86.57          |
| Bert-base-cased         | EM | 79.42                                    | 80.14          | 80.76          | 80.36          |
|                         | F1 | 86.89                                    | 87.78          | 88.33          | 88.34          |
| BatteryBert-cased       | EM | 78.66                                    | 80.47          | 80.67          | 80.74          |
|                         | F1 | 86.44                                    | 87.73          | 88.31          | 88.39          |
| BatterySciBert-cased    | EM | 76.56                                    | 78.48          | 78.52          | 78.53          |
|                         | F1 | 85.04                                    | 86.63          | 86.61          | 86.94          |
| BatteryOnlyBert-cased   | EM | 76.58                                    | 78.82          | 78.47          | 78.45          |
|                         | F1 | 84.64                                    | 86.11          | 86.18          | 86.51          |
|                         |    | <b>Batch Size 32; Learning Rate 2e-5</b> |                |                |                |
|                         |    | <b>Epoch 1</b>                           | <b>Epoch 2</b> | <b>Epoch 3</b> | <b>Epoch 4</b> |
| Bert-base-uncased       | EM | 78.01                                    | 79.24          | 80.06          | 79.76          |
|                         | F1 | 86.35                                    | 87.26          | 87.61          | 87.62          |
| BatteryBert-uncased     | EM | 78.86                                    | 79.75          | 80.76          | 80.48          |
|                         | F1 | 86.75                                    | 87.92          | 88.17          | 88.12          |
| BatterySciBert-uncased  | EM | 77.6                                     | 79.47          | 79.81          | 79.64          |
|                         | F1 | 86.11                                    | 87.27          | 87.66          | 87.51          |
| BatteryOnlyBert-uncased | EM | 76.87                                    | 79.07          | 79.18          | 78.94          |
|                         | F1 | 85.35                                    | 86.81          | 87.05          | 86.96          |
| Bert-base-cased         | EM | 78.99                                    | 80.68          | 80.86          | 80.58          |
|                         | F1 | 86.71                                    | 88.2           | 88.24          | 88.25          |
| BatteryBert-cased       | EM | 79.85                                    | 81.05          | 81.17          | 81.25          |
|                         | F1 | 87.66                                    | 88.5           | 88.71          | 88.81          |
| BatterySciBert-cased    | EM | 76.79                                    | 79.17          | 79.66          | 79.56          |
|                         | F1 | 85.5                                     | 86.77          | 87.43          | 87.24          |
| BatteryOnlyBert-cased   | EM | 77.2                                     | 79.28          | 79.45          | 79.21          |
|                         | F1 | 85.36                                    | 86.65          | 87             | 86.86          |

|                         |    | <b>Batch Size 32; Learning Rate 3e-5</b> |                |                |                |
|-------------------------|----|------------------------------------------|----------------|----------------|----------------|
|                         |    | <b>Epoch 1</b>                           | <b>Epoch 2</b> | <b>Epoch 3</b> | <b>Epoch 4</b> |
| Bert-base-uncased       | EM | 79.1                                     | 79.78          | 80.93          | 79.94          |
|                         | F1 | 86.91                                    | 87.67          | 88.2           | 87.75          |
| BatteryBert-uncased     | EM | 79.36                                    | 80.13          | 81.08          | 80.39          |
|                         | F1 | 87.05                                    | 88.17          | 88.41          | 88.22          |
| BatterySciBert-uncased  | EM | 78.08                                    | 79.47          | 79.74          | 79.46          |
|                         | F1 | 86.59                                    | 87.28          | 87.53          | 87.48          |
| BatteryOnlyBert-uncased | EM | 77.53                                    | 79.14          | 79.18          | 78.7           |
|                         | F1 | 85.68                                    | 86.79          | 87.18          | 86.97          |
| Bert-base-cased         | EM | 79.5                                     | 81.14          | 80.78          | 80.5           |
|                         | F1 | 87.2                                     | 88.51          | 88.3           | 88.31          |
| BatteryBert-cased       | EM | 79.37                                    | 80.89          | 81.36          | 81.04          |
|                         | F1 | 87.06                                    | 88.41          | 88.66          | 88.65          |
| BatterySciBert-cased    | EM | 76.88                                    | 79.51          | 79.21          | 79.26          |
|                         | F1 | 85.65                                    | 87.14          | 87.34          | 87.3           |
| BatteryOnlyBert-cased   | EM | 76.99                                    | 79.74          | 79.56          | 79.23          |
|                         | F1 | 85.3                                     | 86.99          | 87.27          | 87.14          |
|                         |    | <b>Batch Size 32; Learning Rate 5e-5</b> |                |                |                |
|                         |    | <b>Epoch 1</b>                           | <b>Epoch 2</b> | <b>Epoch 3</b> | <b>Epoch 4</b> |
| Bert-base-uncased       | EM | 78.63                                    | 79.95          | 80.45          | 79.23          |
|                         | F1 | 86.73                                    | 87.89          | 87.96          | 87.61          |
| BatteryBert-uncased     | EM | 79.33                                    | 79.62          | 80.4           | 80.26          |
|                         | F1 | 87.02                                    | 87.58          | 87.99          | 88.16          |
| BatterySciBert-uncased  | EM | 77.04                                    | 78.99          | 78.98          | 79.03          |
|                         | F1 | 85.42                                    | 86.72          | 87.02          | 87.09          |
| BatteryOnlyBert-uncased | EM | 76.83                                    | 79.63          | 79.15          | 78.31          |
|                         | F1 | 85.08                                    | 87.07          | 87.23          | 86.72          |
| Bert-base-cased         | EM | 79.73                                    | 81.3           | 80.58          | 80.18          |
|                         | F1 | 87.34                                    | 88.58          | 88.31          | 88.12          |
| BatteryBert-cased       | EM | 79.59                                    | 80.88          | 81.11          | 80.8           |
|                         | F1 | 87.23                                    | 88.2           | 88.54          | 88.53          |
| BatterySciBert-cased    | EM | 76.88                                    | 78.68          | 78.59          | 79.09          |
|                         | F1 | 85.41                                    | 86.53          | 86.71          | 87.12          |
| BatteryOnlyBert-cased   | EM | 75.45                                    | 77.86          | 78.67          | 78.46          |
|                         | F1 | 83.81                                    | 85.67          | 86.35          | 86.32          |



## S5. Question Answering Data Set

The full data set can be found at

<https://huggingface.co/datasets/batterydata/battery-device-data-qa>

Examples of the question answering evaluation data set are given below:

|     | Question             | Answer                | Context                                                                                                                                                                                                                                                                                                                                                                                                         | Start index |
|-----|----------------------|-----------------------|-----------------------------------------------------------------------------------------------------------------------------------------------------------------------------------------------------------------------------------------------------------------------------------------------------------------------------------------------------------------------------------------------------------------|-------------|
| 1   | What is the cathode? | Al foil               | The blended slurry was then cast onto a clean current collector (Al foil for the cathode and Cu foil for the anode) and dried at 90 °C under vacuum overnight.                                                                                                                                                                                                                                                  | 645         |
| 2   | What is the anode?   | Cu foil               | The blended slurry was then cast onto a clean current collector (Al foil for the cathode and Cu foil for the anode) and dried at 90 °C under vacuum overnight. Finally, the obtained electrodes were cut into desired shapes on demand. It should be noted that the electrode mass ratio of cathode/anode is set to about 4, thus achieving the battery balance.                                                | 673         |
| 3   | What is the cathode? | SiC/RGO nanocomposite | In conclusion, the SiC/RGO nanocomposite, integrating the synergistic effect of SiC flakes and RGO, was synthesized by an in situ gas-solid fabrication method. Taking advantage of the enhanced photogenerated charge separation, large CO <sub>2</sub> adsorption, and numerous exposed active sites, SiC/RGO nanocomposite served as the cathode material for the photo-assisted Li-CO <sub>2</sub> battery. | 284         |
| ... | ...                  | ...                   | ...                                                                                                                                                                                                                                                                                                                                                                                                             | ...         |

## S6. Document Classification Data Set

The document classification data set includes 29,472 battery papers and 17,191 non-battery papers. These papers are manually labeled in terms of the journals to which they belong. 14 battery journals and 1,044 non battery journals were selected to form this database.

Battery journals:

|                                                       |                                        |
|-------------------------------------------------------|----------------------------------------|
| Applied Energy                                        | Battery Reference Book                 |
| Electrochimica Acta                                   | Energy & Environmental Science         |
| Journal of Applied Electrochemistry                   | Journal of Electroanalytical Chemistry |
| Journal of Energy Chemistry                           | Journal of Energy Storage              |
| Journal of Power Sources                              | Nano Energy                            |
| Nature Energy                                         | Renewable Energy                       |
| Renewable and Sustainable Energy Reviews              |                                        |
| Renewable Energy Conversion, Transmission and Storage |                                        |

Non-battery journals:

|                                                          |
|----------------------------------------------------------|
| 3-D Fibrous Assemblies                                   |
| A Baker's Dozen                                          |
| ADHD Attention Deficit and Hyperactivity Disorders       |
| AIDS Research and Therapy                                |
| Accident Analysis & Prevention                           |
| Acoustics Australia                                      |
| Acta Analytica                                           |
| Acta Geodaetica et Geophysica                            |
| Acta Mathematica Scientia                                |
| Acta Mechanica Solida Sinica                             |
| Acta Metallurgica Sinica (English Letters)               |
| Acta Neuropathologica                                    |
| Acta Otorrinolaringológica Española                      |
| Acta Tropica                                             |
| Acta Veterinaria Scandinavica                            |
| Actas Dermo-Sifiliográficas (English Edition)            |
| Advanced Modeling and Simulation in Engineering Sciences |
| Advanced Textiles for Wound Care                         |
| Advances in Applied Mechanics                            |
| Advances in Ceramic Matrix Composites                    |

|                                                                         |
|-------------------------------------------------------------------------|
| Advances in Climate Change Research                                     |
| Advances in Developmental Biology and Biochemistry                      |
| Advances in Food Traceability Techniques and Technologies               |
| Advances in Health Sciences Education                                   |
| Advances in Insect Physiology                                           |
| Advances in Non-Volatile Memory and Storage Technology                  |
| Advances in Parasitology                                                |
| Advances in Smart Medical Textiles                                      |
| Advances in Sugarcane Biorefinery                                       |
| Agricultural and Forest Meteorology                                     |
| Air & Space Europe                                                      |
| Allergo Journal International                                           |
| Alzheimer's & Dementia: Translational Research & Clinical Interventions |
| American Journal of Ophthalmology                                       |
| Amino Acids                                                             |
| An Introduction to Biochemistry                                         |
| Analog Synthesizers                                                     |
| Animal Biotelemetry                                                     |
| Annales de Chimie Science des Matériaux                                 |
| Annales de Chirurgie Vasculaire                                         |
| Annales de Génétique                                                    |
| Annales de Réadaptation et de Médecine Physique                         |
| Annals of Clinical Microbiology and Antimicrobials                      |
| Annals of Surgical Oncology                                             |
| Annals of Vascular Surgery                                              |
| Annual Reports Section "B" (Organic Chemistry)                          |
| Anthropocene                                                            |
| Applied Biochemistry and Biotechnology                                  |
| Applied Clay Science                                                    |
| Applied Coal Petrology                                                  |
| Applied Computing and Informatics                                       |
| Applied Dimensional Analysis and Modeling                               |
| Applied Geochemistry                                                    |
| Applied Mathematics & Optimization                                      |
| Applied Mycology and Biotechnology                                      |
| Applied Process Design for Chemical & Petrochemical Plants              |
| Applied Soft Computing                                                  |

|                                                                                    |
|------------------------------------------------------------------------------------|
| Applied and Preventive Psychology                                                  |
| Applying Knowledge Management                                                      |
| Aquaculture International                                                          |
| Architecture of Network Systems                                                    |
| Archive for Rational Mechanics and Analysis                                        |
| Archives de Pédiatrie                                                              |
| Archives of Dermatological Research                                                |
| Archives of Osteoporosis                                                           |
| Archives of Pharmacal Research                                                     |
| Archives of Physical Medicine and Rehabilitation                                   |
| Argumentation                                                                      |
| Assessment and Treatment of Child Psychopathology and Developmental Disabilities   |
| Astrophysics and Space Science                                                     |
| Atención Familiar                                                                  |
| Atención Primaria                                                                  |
| Atmospheric Environment                                                            |
| Audio Wiring Guide                                                                 |
| Australasian Marketing Journal (AMJ)                                               |
| Automated Lighting                                                                 |
| Automation and Remote Control                                                      |
| Autonomous Agents and Multi-Agent Systems                                          |
| Autophagy: Cancer, Other Pathologies, Inflammation, Immunity, Infection, and Aging |
| Avery's Diseases of the Newborn                                                    |
| BMC Blood Disorders                                                                |
| BMC Emergency Medicine                                                             |
| BMC Health Services Research                                                       |
| BMC Medical Ethics                                                                 |
| BMC Molecular Biology                                                              |
| BMC Musculoskeletal Disorders                                                      |
| BMC Pregnancy and Childbirth                                                       |
| BMC Psychology                                                                     |
| Behavior Research Methods, Instruments, & Computers                                |
| Best Practice & Research Clinical Gastroenterology                                 |
| BioControl                                                                         |
| BioIndustry Ethics                                                                 |
| BioMedicine                                                                        |
| Bioactive Materials                                                                |

|                                                                     |
|---------------------------------------------------------------------|
| Bioanalytical Reviews                                               |
| Biochimica et Biophysica Acta (BBA) - Gene Structure and Expression |
| Biochimica et Biophysica Acta (BBA) - Reviews on Cancer             |
| Biogeochemistry                                                     |
| Biohydrogen                                                         |
| Biological Cybernetics                                              |
| Biological Invasions                                                |
| Biology & Philosophy                                                |
| Biology and Fertility of Soils                                      |
| Biology of Blood and Marrow Transplantation                         |
| Biomarkers in Toxicology                                            |
| Biomedical Engineering Letters                                      |
| Biomedical Engineering in Gastrointestinal Surgery                  |
| Biomedical Ethics for Engineers                                     |
| Biomedical Information Technology                                   |
| Biomedical Microdevices                                             |
| Biomolecular Engineering                                            |
| Biophysical Economics and Sustainability                            |
| Biophysics                                                          |
| Bioresources and Bioprocessing                                      |
| Biotechnology for Biofuels                                          |
| Biscuit Baking Technology                                           |
| Blue Books of Neurology                                             |
| Bluetooth Application Developer's Guide                             |
| Boletín de la Sociedad Española de Cerámica y Vidrio                |
| Bonding Theory for Metals and Alloys                                |
| Borish's Clinical Refraction                                        |
| Brain Mapping                                                       |
| Brain Mapping: The Systems                                          |
| Brain Research Bulletin                                             |
| Brain Research Reviews                                              |
| Brain Stimulation                                                   |
| Brain Structure and Function                                        |
| Brain and Language                                                  |
| Brittonia                                                           |
| Building Robots with LEGO Mindstorms NXT                            |
| Building Wireless Sensor Networks                                   |

|                                                                        |
|------------------------------------------------------------------------|
| Bulletin of Earthquake Engineering                                     |
| Business Modeling and Data Mining                                      |
| CABI Agriculture and Bioscience                                        |
| CANON DSLR                                                             |
| CCF Transactions on Pervasive Computing and Interaction                |
| CCTV Surveillance                                                      |
| CE Conformity Marking                                                  |
| Canadian Journal of Diabetes                                           |
| Canadian Journal of Emergency Medicine                                 |
| Cancer Gene Therapy                                                    |
| Canon EOS Digital Rebel XS/1000D                                       |
| Carbon Dioxide Utilisation                                             |
| Carbon Resources Conversion                                            |
| Cardiovascular Intervention and Therapeutics                           |
| Cardiovascular Pathology                                               |
| Cardiovascular Therapeutics                                            |
| Case Studies in Thermal Engineering                                    |
| Cases Journal                                                          |
| Cell Biology International                                             |
| Cell Death & Differentiation                                           |
| Cellular Response to Biomaterials                                      |
| Chalcogenide Glasses                                                   |
| Chemoecology                                                           |
| Chinese Journal of Analytical Chemistry                                |
| Chinese Journal of Traumatology                                        |
| Chinese Medicine                                                       |
| Cirugía Española (English Edition)                                     |
| Cities                                                                 |
| Cladistics                                                             |
| Clay-Polymer Nanocomposites                                            |
| Climate Vulnerability                                                  |
| Clinical Assessment and Intervention for Autism Spectrum Disorders     |
| Clinical Cardiac Pacing, Defibrillation, and Resynchronization Therapy |
| Clinical Dentistry Reviewed                                            |
| Clinical Diabetes                                                      |
| Clinical Microbiology and Infection                                    |
| Clinical Neurophysiology                                               |

|                                                                    |
|--------------------------------------------------------------------|
| Clinical Oral Investigations                                       |
| Clinical Radiology                                                 |
| Clinical Reviews in Bone and Mineral Metabolism                    |
| Clinical Techniques in Equine Practice                             |
| Clinical and Translational Gastroenterology                        |
| Clinical and Translational Imaging                                 |
| Clinical and Translational Oncology                                |
| Clinical and Translational Science                                 |
| Coal Energy Systems                                                |
| Cognitive Development                                              |
| Cognitive Psychology                                               |
| Cognitive and Behavioral Practice                                  |
| Colloids and Interface Science Communications                      |
| Communications Physics                                             |
| Communications in Nonlinear Science and Numerical Simulation       |
| Complementary Therapies in Medicine                                |
| Complementary and Integrative Therapies for Cardiovascular Disease |
| Complete Casting Handbook                                          |
| Composite Magnetolectrics                                          |
| Composites Part B: Engineering                                     |
| Comprehensive Medicinal Chemistry III                              |
| Comprehensive Natural Products II                                  |
| Comprehensive Organic Functional Group Transformations II          |
| Comptes Rendus Chimie                                              |
| Computational Statistics                                           |
| Computer Methods in Applied Mechanics and Engineering              |
| Computer-Aided Design                                              |
| Computerized Medical Imaging and Graphics                          |
| Computers & Fluids                                                 |
| Computers & Graphics                                               |
| Computers & Structures                                             |
| Construction Hazardous Materials Compliance Guide                  |
| Contemporary Concepts of Condensed Matter Science                  |
| Contemporary Educational Psychology                                |
| Continental Shelf Research                                         |
| Contraception                                                      |
| Contributions to Economic Analysis                                 |

|                                                                                         |
|-----------------------------------------------------------------------------------------|
| Copper                                                                                  |
| Corporate Environmental Strategy                                                        |
| Cortex                                                                                  |
| Criminology                                                                             |
| Crisis Negotiations                                                                     |
| Crystallization                                                                         |
| Current Atherosclerosis Reports                                                         |
| Current Behavioral Neuroscience Reports                                                 |
| Current Cardiology Reports                                                              |
| Current Climate Change Reports                                                          |
| Current Forestry Reports                                                                |
| Current HIV/AIDS Reports                                                                |
| Current Hematologic Malignancy Reports                                                  |
| Current Neurology and Neuroscience Reports                                              |
| Current Oncology Reports                                                                |
| Current Opinion in Genetics & Development                                               |
| Current Opinion in Neurobiology                                                         |
| Current Paediatrics                                                                     |
| Current Problems in Diagnostic Radiology                                                |
| Current Therapy of Trauma and Surgical Critical Care                                    |
| Data Conversion Handbook                                                                |
| Data Science and Engineering                                                            |
| Deep Sea Research Part I: Oceanographic Research Papers                                 |
| Demystifying Switching Power Supplies                                                   |
| Der Internist                                                                           |
| Dermatology and Therapy                                                                 |
| Designing Embedded Systems with PIC Microcontrollers                                    |
| Development Genes and Evolution                                                         |
| Developmental Cognitive Neuroscience                                                    |
| Developments in Food Science                                                            |
| Developments in Surface Contamination and Cleaning: Applications of Cleaning Techniques |
| Diagnostic Immunohistochemistry                                                         |
| Dialogue Editing for Motion Pictures                                                    |
| Diet and Nutrition in Dementia and Cognitive Decline                                    |
| Digital Compositing for Film and Video                                                  |
| Digital Signage                                                                         |
| Dilute Nitride Semiconductors                                                           |



|                                                                        |
|------------------------------------------------------------------------|
| Direct Alcohol Fuel Cells for Portable Applications                    |
| Directing and Producing for Television                                 |
| Disasters and Public Health                                            |
| Drinking Water Security for Engineers, Planners, and Managers          |
| Drugs & Aging                                                          |
| Drugs, Addiction, and the Brain                                        |
| Dynamics of Tethered Satellite Systems                                 |
| EPMA Journal                                                           |
| ERCPC                                                                  |
| EURASIP Journal on Audio, Speech, and Music Processing                 |
| EURO Journal on Transportation and Logistics                           |
| Eating and Weight Disorders - Studies on Anorexia, Bulimia and Obesity |
| Ecological Indicators                                                  |
| Ecological Modelling                                                   |
| Economia Politica                                                      |
| Economic Modelling                                                     |
| Economics & Human Biology                                              |
| Economía Informa                                                       |
| Ecotextiles                                                            |
| Ecotoxicology                                                          |
| Educational Assessment, Evaluation and Accountability                  |
| Effective Physical Security                                            |
| Effective Security Management                                          |
| Egyptian Journal of Ear, Nose, Throat and Allied Sciences              |
| Egyptian Journal of Medical Human Genetics                             |
| Electoral Studies                                                      |
| Electrical Engineer's Reference Book                                   |
| Electrical Engineering 101                                             |
| Electrochemical Water and Wastewater Treatment                         |
| Electronic Enclosures, Housings and Packages                           |
| Elements of Orthopaedic Surgery                                        |
| Embedded Media Processing                                              |
| Embedded System Design on a Shoestring                                 |
| Embedded Systems                                                       |
| Encyclopedia of Biomedical Engineering                                 |
| Encyclopedia of Forensic and Legal Medicine                            |
| Encyclopedia of Gastroenterology                                       |

|                                                           |
|-----------------------------------------------------------|
| Encyclopedia of Human Behavior                            |
| Encyclopedia of Insects                                   |
| Encyclopedia of Language & Linguistics                    |
| Encyclopedia of Social Measurement                        |
| Encyclopedia of Sustainable Technologies                  |
| Encyclopedia of the Eye                                   |
| Endocrine                                                 |
| Endocrinología y Nutrición                                |
| Enfermería Clínica                                        |
| Enfermería Clínica (English Edition)                      |
| Engineering                                               |
| Entrepreneurs                                             |
| Environmental Fluid Mechanics                             |
| Epilepsy & Behavior                                       |
| Erwerbs-Obstbau                                           |
| Esophagus                                                 |
| Essentials of Lean Six Sigma                              |
| Estuaries and Coasts                                      |
| Ethanol                                                   |
| Eurasian Economic Review                                  |
| European Archives of Psychiatry and Clinical Neuroscience |
| European Economic Review                                  |
| European Journal of Cancer                                |
| European Journal of Clinical Nutrition                    |
| European Journal of Medical Genetics                      |
| European Journal of Medical Research                      |
| European Journal of Nutrition                             |
| European Journal of Paediatric Neurology                  |
| European Journal of Plastic Surgery                       |
| European Journal of Trauma & Dissociation                 |
| European Surgery                                          |
| Evidence-Based Dentistry                                  |
| Evidence-Based Educational Methods                        |
| Evolution: Education and Outreach                         |
| Exergy Analysis and Thermoeconomics of Buildings          |
| Experimental Cell Research                                |
| Experimental Gerontology                                  |

|                                                                     |
|---------------------------------------------------------------------|
| Experimental Methods in the Physical Sciences                       |
| Experimental and Applied Acarology                                  |
| Expert Systems with Applications                                    |
| Exploring Engineering                                               |
| Exposure and Health                                                 |
| Extremophiles                                                       |
| FEMS Microbiology Ecology                                           |
| FISMA Compliance Handbook                                           |
| Field Guide to Appropriate Technology                               |
| Filters and Filtration Handbook                                     |
| Filtration Industry Analyst                                         |
| Fine Chemicals Manufacture                                          |
| Fire Protection Engineering in Building Design                      |
| Fire Pump Arrangements at Industrial Facilities                     |
| Fish Physiology                                                     |
| Fisioterapia                                                        |
| Fixed/Mobile Convergence and Beyond                                 |
| FlatChem                                                            |
| Folia Microbiologica                                                |
| Food Quality and Shelf Life                                         |
| Food Science and Human Wellness                                     |
| Forensic Science, Medicine and Pathology                            |
| Forensic Toxicology                                                 |
| Forest Policy and Economics                                         |
| Foundations of Artificial Intelligence                              |
| Fractography in Failure Analysis of Polymers                        |
| Free Radical Biology and Medicine                                   |
| From Neuroscience To Neurology                                      |
| From Smart Grid to Internet of Energy                               |
| Functional Dyes                                                     |
| Functional Neurobiology of Aging                                    |
| Functional Textiles for Improved Performance, Protection and Health |
| Fundamental Biomaterials: Ceramics                                  |
| Fundamentals of Molecular Structural Biology                        |
| Fusion                                                              |
| Future of Utilities Utilities of the Future                         |
| GSTF Journal of Engineering Technology (JET)                        |

|                                                           |
|-----------------------------------------------------------|
| Gene                                                      |
| General Philosophy of Science                             |
| Geoforum                                                  |
| Geopolymers                                               |
| Geoscience Frontiers                                      |
| Global Environmental Change Part B: Environmental Hazards |
| Gold Bulletin                                             |
| Groundwater for Sustainable Development                   |
| Group Decision and Negotiation                            |
| HDTV and the Transition to Digital Broadcasting           |
| HSS Journal (®)                                           |
| Habitat International                                     |
| Handbook of Adhesives and Surface Preparation             |
| Handbook of Advanced Ceramics                             |
| Handbook of Biomechanics                                  |
| Handbook of Biopolymers and Biodegradable Plastics        |
| Handbook of Economic Growth                               |
| Handbook of Green Building Design and Construction        |
| Handbook of Hydrothermal Technology                       |
| Handbook of Liquids-Assisted Laser Processing             |
| Handbook of Models for Human Aging                        |
| Handbook of Nonwoven Filter Media                         |
| Handbook of Organizational Creativity                     |
| Handbook of Psychological Assessment                      |
| Handbook of Public Economics                              |
| Handbook of Solvents                                      |
| Handbook on the Physics and Chemistry of Rare Earths      |
| Handbook on the Toxicology of Metals                      |
| Hardware/Firmware Interface Design                        |
| Hazardous Chemicals Handbook                              |
| Health Research Policy and Systems                        |
| Health and Quality of Life Outcomes                       |
| Health and Technology                                     |
| Heat Pipes                                                |
| Hepatology                                                |
| Hepatology Research                                       |
| Hereditary Cancer in Clinical Practice                    |

|                                                                                |
|--------------------------------------------------------------------------------|
| Heterogeneous Photocatalysis                                                   |
| High Frequency and Microwave Engineering                                       |
| High Performance Textiles and their Applications                               |
| How to Cheat in Photoshop CS3                                                  |
| Human Cell                                                                     |
| Human Genetics                                                                 |
| Human Growth and Development                                                   |
| Human Immunology                                                               |
| Human Nature                                                                   |
| Hybrid Polymer Composite Materials                                             |
| Hydrogeology Journal                                                           |
| Hyperfine Interactions                                                         |
| IMF Economic Review                                                            |
| IMS Application Developer's Handbook                                           |
| ISPRS Journal of Photogrammetry and Remote Sensing                             |
| ISSS Journal of Micro and Smart Systems                                        |
| IST International Surface Technology                                           |
| ITBM-RBM                                                                       |
| IZA Journal of Labor & Development                                             |
| Icarus                                                                         |
| Image and Vision Computing                                                     |
| Immunotoxicology of Drugs and Chemicals: an Experimental and Clinical Approach |
| Improving Comfort in Clothing                                                  |
| In-Pack Processed Foods                                                        |
| Indian Journal of Orthopaedics                                                 |
| Indian Journal of Pediatrics                                                   |
| Indian Journal of Surgical Oncology                                            |
| Industrial Crops and Products                                                  |
| Industrial Process Automation Systems                                          |
| Infection                                                                      |
| Information Economics and Policy                                               |
| Information Fusion                                                             |
| Information Retrieval                                                          |
| Information and Computation                                                    |
| Infrared Physics & Technology                                                  |
| Infrastructure Complexity                                                      |
| Innovations in Fuel Economy and Sustainable Road Transport                     |

|                                                                      |
|----------------------------------------------------------------------|
| Innovations in Systems and Software Engineering                      |
| Inorganica Chimica Acta                                              |
| Instructional Science                                                |
| Intelligent Industrial Systems                                       |
| Interest Groups & Advocacy                                           |
| Internal Combustion Engines: Performance, Fuel Economy and Emissions |
| International Advances in Economic Research                          |
| International Encyclopedia of Public Health                          |
| International Immunopharmacology                                     |
| International Journal for Educational and Vocational Guidance        |
| International Journal of Accounting Information Systems              |
| International Journal of Advanced Structural Engineering             |
| International Journal of Applied Positive Psychology                 |
| International Journal of Child Care and Education Policy             |
| International Journal of Coal Science & Technology                   |
| International Journal of Disaster Risk Science                       |
| International Journal of Fatigue                                     |
| International Journal of Food Microbiology                           |
| International Journal of Geo-Engineering                             |
| International Journal of Industrial Ergonomics                       |
| International Journal of Information Management                      |
| International Journal of Machine Tools and Manufacture               |
| International Journal of Nursing Studies                             |
| International Journal of Osteopathic Medicine                        |
| International Journal of Parallel Programming                        |
| International Journal of Pediatric Endocrinology                     |
| International Journal of Politics, Culture, and Society              |
| International Journal of Retina and Vitreous                         |
| International Journal of Rock Mechanics and Mining Sciences          |
| International Journal of Trauma Nursing                              |
| International Journal on Software Tools for Technology Transfer      |
| International Orthopaedics                                           |
| International Review of Research in Mental Retardation               |
| Introduction to Digital Systems                                      |
| Invertebrate Neuroscience                                            |
| Investigational New Drugs                                            |
| Ionic Liquids in Separation Technology                               |

|                                                          |
|----------------------------------------------------------|
| Iran Journal of Computer Science                         |
| Irrigation Science                                       |
| Israel Journal of Health Policy Research                 |
| Izvestiya, Atmospheric and Oceanic Physics               |
| JACC: Cardiovascular Imaging                             |
| JACC: Cardiovascular Interventions                       |
| JETP Letters                                             |
| Jornal de Pediatria                                      |
| Journal für Verbraucherschutz und Lebensmittelsicherheit |
| Journal of Abnormal Child Psychology                     |
| Journal of Advanced Research                             |
| Journal of Agricultural and Environmental Ethics         |
| Journal of Air Transport Management                      |
| Journal of Anesthesia History                            |
| Journal of Animal Science and Biotechnology              |
| Journal of Animal Science and Technology                 |
| Journal of Behavioral Medicine                           |
| Journal of Big Data                                      |
| Journal of Biochemical and Biophysical Methods           |
| Journal of Biological Engineering                        |
| Journal of Biomedical Research                           |
| Journal of Bioscience and Bioengineering                 |
| Journal of Biosciences                                   |
| Journal of Business Research                             |
| Journal of Business Venturing                            |
| Journal of Cardiology                                    |
| Journal of Cardiothoracic Surgery                        |
| Journal of Catalysis                                     |
| Journal of Cataract & Refractive Surgery                 |
| Journal of Cell Communication and Signaling              |
| Journal of Cereal Science                                |
| Journal of Chemical Neuroanatomy                         |
| Journal of China University of Geosciences               |
| Journal of Circadian Rhythms                             |
| Journal of Clinical Densitometry                         |
| Journal of Communications and Information Networks       |
| Journal of Comparative Economics                         |

|                                                                             |
|-----------------------------------------------------------------------------|
| Journal of Compassionate Health Care                                        |
| Journal of Computer-Aided Molecular Design                                  |
| Journal of Constructional Steel Research                                    |
| Journal of Consumer Psychology                                              |
| Journal of Contemporary Psychotherapy                                       |
| Journal of Contextual Behavioral Science                                    |
| Journal of Crohn's and Colitis                                              |
| Journal of Crop Science and Biotechnology                                   |
| Journal of Cultural Heritage                                                |
| Journal of Cystic Fibrosis                                                  |
| Journal of Diabetes and its Complications                                   |
| Journal of Ecology and Environment                                          |
| Journal of Economic Dynamics and Control                                    |
| Journal of Economics and Finance                                            |
| Journal of Economics, Race, and Policy                                      |
| Journal of Engineering Mathematics                                          |
| Journal of Environmental Radioactivity                                      |
| Journal of Ethnopharmacology                                                |
| Journal of Experimental Child Psychology                                    |
| Journal of Experimental Marine Biology and Ecology                          |
| Journal of Exposure Science & Environmental Epidemiology                    |
| Journal of Failure Analysis and Prevention                                  |
| Journal of Fluency Disorders                                                |
| Journal of Foot and Ankle Research                                          |
| Journal of Friction and Wear                                                |
| Journal of Global Entrepreneurship Research                                 |
| Journal of Happiness Studies                                                |
| Journal of Hospitality, Leisure, Sport & Tourism Education                  |
| Journal of Huazhong University of Science and Technology [Medical Sciences] |
| Journal of Industrial Microbiology and Biotechnology                        |
| Journal of Infection and Chemotherapy                                       |
| Journal of Inflammation                                                     |
| Journal of Information Security and Applications                            |
| Journal of Integrative Agriculture                                          |
| Journal of Investigative Dermatology                                        |
| Journal of Light Metals                                                     |
| Journal of Luminescence                                                     |



|                                                        |
|--------------------------------------------------------|
| Journal of Management                                  |
| Journal of Manipulative and Physiological Therapeutics |
| Journal of Maritime Archaeology                        |
| Journal of Materials Science: Materials in Medicine    |
| Journal of Mathematics Teacher Education               |
| Journal of Mathematics in Industry                     |
| Journal of Medical Systems                             |
| Journal of Men's Health                                |
| Journal of Microscopy and Ultrastructure               |
| Journal of Midwifery & Women's Health                  |
| Journal of Modern Transportation                       |
| Journal of Molecular Neuroscience                      |
| Journal of Multinational Financial Management          |
| Journal of Neonatal Nursing                            |
| Journal of Network and Computer Applications           |
| Journal of Network and Systems Management              |
| Journal of Neural Transmission                         |
| Journal of Neuroinflammation                           |
| Journal of Nuclear Cardiology                          |
| Journal of Ocean Engineering and Science               |
| Journal of Ornithology                                 |
| Journal of Orthopaedic Nursing                         |
| Journal of Orthopaedics and Traumatology               |
| Journal of Otolaryngology - Head & Neck Surgery        |
| Journal of Ovarian Research                            |
| Journal of Parallel and Distributed Computing          |
| Journal of Pediatric and Adolescent Gynecology         |
| Journal of Petroleum Exploration and Production        |
| Journal of Plant Biochemistry and Biotechnology        |
| Journal of Plant Growth Regulation                     |
| Journal of Plant Pathology                             |
| Journal of Plant Research                              |
| Journal of Plastic, Reconstructive & Aesthetic Surgery |
| Journal of Police and Criminal Psychology              |
| Journal of Product Innovation Management               |
| Journal of Prosthodontic Research                      |
| Journal of Proteomics                                  |

|                                                                              |
|------------------------------------------------------------------------------|
| Journal of Psychopathology and Behavioral Assessment                         |
| Journal of Psychosocial Rehabilitation and Mental Health                     |
| Journal of Psychosomatic Research                                            |
| Journal of Religious Education                                               |
| Journal of Retailing                                                         |
| Journal of Science and Medicine in Sport                                     |
| Journal of Science in Sport and Exercise                                     |
| Journal of Sport and Health Science                                          |
| Journal of Statistical Planning and Inference                                |
| Journal of Surgical Research                                                 |
| Journal of Sustainable Mining                                                |
| Journal of Taibah University for Science                                     |
| Journal of Tissue Viability                                                  |
| Journal of Translational Medicine                                            |
| Journal of Urban Health                                                      |
| Journal of Veterinary Behavior                                               |
| Journal of Virological Methods                                               |
| Journal of Visual Communication and Image Representation                     |
| Journal of Volcanology and Seismology                                        |
| Journal of Web Semantics                                                     |
| Journal of Zhejiang University-SCIENCE B                                     |
| Journal of the American Oil Chemists' Society                                |
| Journal of the Brazilian Computer Society                                    |
| Journal of the Chemical Society, Dalton Transactions                         |
| Journal of the Knowledge Economy                                             |
| Journal of the National Medical Association                                  |
| Journal on Data Semantics                                                    |
| Keeping Religious Institutions Secure                                        |
| Killer Camera Rigs That You Can Build                                        |
| Kinetics and Catalysis                                                       |
| Kirk and Bistner's Handbook of Veterinary Procedures and Emergency Treatment |
| Korean Social Science Journal                                                |
| La Rivista del Nuovo Cimento                                                 |
| La radiologia medica                                                         |
| Laboratory Animal Medicine                                                   |
| Labour Economics                                                             |
| Landscape Ecology                                                            |

|                                                                  |
|------------------------------------------------------------------|
| Langford's Basic Photography                                     |
| Le Praticien en Anesthésie Réanimation                           |
| Lead-Acid Batteries: Science and Technology                      |
| Learning and Memory: A Comprehensive Reference                   |
| Legal Aspects of General Dental Practice                         |
| Library Collections, Acquisitions, and Technical Services        |
| Lighting Engineering                                             |
| Lightweight Design worldwide                                     |
| Lipids                                                           |
| Lipids in Health and Disease                                     |
| Logistics Operations and Management                              |
| Low Back Pain Handbook                                           |
| MRS Internet Journal of Nitride Semiconductor Research           |
| Managing Wine Quality                                            |
| Managing and Securing a Cisco SWAN                               |
| Manufacture                                                      |
| Marine Geophysical Researches                                    |
| Marine Life Science & Technology                                 |
| Marine Systems & Ocean Technology                                |
| Material Selection for Thermoplastic Parts                       |
| Materials in Sports Equipment                                    |
| Mathematics Education Research Journal                           |
| Mathematics and Computers in Simulation                          |
| Mathematics in Science and Engineering                           |
| Maturitas                                                        |
| McDonald and Avery's Dentistry for the Child and Adolescent      |
| Measuring Ocean Currents                                         |
| Meccanica                                                        |
| Mechatronics for Safety, Security and Dependability in a New Era |
| Medical Oncology                                                 |
| Medical Robotics                                                 |
| Medical and Healthcare Textiles                                  |
| Medicina Intensiva (English Edition)                             |
| Medizinische Klinik - Intensivmedizin und Notfallmedizin         |
| Membrane Technology                                              |
| Membranes for Clean and Renewable Power Applications             |
| Metal Finishing                                                  |

|                                                                    |
|--------------------------------------------------------------------|
| Metal Powder Report                                                |
| Metals and Materials                                               |
| Methods in Microbiology                                            |
| Micro-Manufacturing Engineering and Technology                     |
| Microbial Cell Factories                                           |
| Microbial Electrochemical Technology                               |
| Microbial Forensics                                                |
| Microbiological Research                                           |
| Microwave Wireless Communications                                  |
| Mineral Exploration                                                |
| Mixing a Musical                                                   |
| Modeling of Chemical Kinetics and Reactor Design                   |
| Modern Rheumatology                                                |
| Molecular Autism                                                   |
| Molecular Breeding                                                 |
| Molecular Medical Microbiology                                     |
| Molecular Metabolism                                               |
| Molecular Oncology                                                 |
| Molecular Pain                                                     |
| Molecular Phylogenetics and Evolution                              |
| Molecular Therapy - Nucleic Acids                                  |
| Molecular and Cellular Pediatrics                                  |
| Monatshefte für Chemie - Chemical Monthly                          |
| Motor Vehicle Collisions                                           |
| Multi-Camera Networks                                              |
| Multidisciplinary Respiratory Medicine                             |
| Multilayer Flexible Packaging                                      |
| Multimedia Tools and Applications                                  |
| Multiprocessor Systems-on-Chips                                    |
| Multisensory Perception                                            |
| Mutation Research/Genetic Toxicology and Environmental Mutagenesis |
| Mycological Research                                               |
| Mycopathologia                                                     |
| Myelin Biology and Disorders                                       |
| NDT & E International                                              |
| Nano Convergence                                                   |
| NanoEthics                                                         |

|                                                                    |
|--------------------------------------------------------------------|
| Nanoarchitectonics in Biomedicine                                  |
| Nanolayer Research                                                 |
| Nanostructured Metals and Alloys                                   |
| Nanostructures for Drug Delivery                                   |
| Nanotechnology Applications for Tissue Engineering                 |
| Nanotechnology Safety                                              |
| Natural Computing                                                  |
| Natural Language & Linguistic Theory                               |
| Nature Astronomy                                                   |
| Nature Chemical Biology                                            |
| Nature Clinical Practice Neurology                                 |
| Nature Machine Intelligence                                        |
| Nature Medicine                                                    |
| Nature Metabolism                                                  |
| Nature Methods                                                     |
| Nature Neuroscience                                                |
| Nature Reviews Cardiology                                          |
| Nature Reviews Neurology                                           |
| Navigating the Maze                                                |
| Nerves and Nerve Injuries                                          |
| Network Modeling Analysis in Health Informatics and Bioinformatics |
| Networking Explained                                               |
| Networks and Spatial Economics                                     |
| Networks on Chips                                                  |
| Neurochemical Research                                             |
| Neurochirurgie                                                     |
| Neurofeedback and Neuromodulation Techniques and Applications      |
| Neurogenetics                                                      |
| Neurology and Clinical Neuroscience                                |
| Neurología Argentina                                               |
| Neuropharmacology                                                  |
| Neuroscience                                                       |
| Neuroscience and Behavioral Physiology                             |
| Neurosensory Disorders in Mild Traumatic Brain Injury              |
| Neurosurgical Review                                               |
| New Trends in Coal Conversion                                      |
| Newnes Guide to Radio and Communications Technology                |

|                                                                                           |
|-------------------------------------------------------------------------------------------|
| Nikon D60                                                                                 |
| Non-Covalent Interactions in Quantum Chemistry and Physics                                |
| Non-Thermal Plasma Technology for Polymeric Materials                                     |
| Nonclinical Development of Novel Biologics, Biosimilars, Vaccines and Specialty Biologics |
| Nonlinear Analysis: Theory, Methods & Applications                                        |
| Notes on Chronic Otorrhœa                                                                 |
| Nutraceuticals                                                                            |
| Obesity Surgery                                                                           |
| Obstetrics, Gynaecology & Reproductive Medicine                                           |
| Ocean Engineering                                                                         |
| Ocular Therapeutics                                                                       |
| One Health Outlook                                                                        |
| Open Source Software                                                                      |
| Operative Techniques in Neurosurgery                                                      |
| Optical Fiber Technology                                                                  |
| Optical and Quantum Electronics                                                           |
| Optimization Letters                                                                      |
| Optometry - Journal of the American Optometric Association                                |
| Oral Oncology Supplement                                                                  |
| Oral Science International                                                                |
| Organic and Medicinal Chemistry Letters                                                   |
| Orthopaedic Physical Therapy Secrets                                                      |
| Otologic Surgery                                                                          |
| PAIN                                                                                      |
| PEM Fuel Cell Modeling and Simulation Using Matlab                                        |
| Paediatrics and Child Health                                                              |
| Paleontological Journal                                                                   |
| Palgrave Communications                                                                   |
| Parasitoid Viruses                                                                        |
| Passive Optical Networks                                                                  |
| Pathology                                                                                 |
| Pediatric Cardiology                                                                      |
| Pediatric Critical Care                                                                   |
| Pediatric Neurology                                                                       |
| Pediatric Rheumatology                                                                    |
| Perception & Psychophysics                                                                |
| Perfect Passwords                                                                         |

|                                                                                       |
|---------------------------------------------------------------------------------------|
| Performance Evaluation                                                                |
| Perioperative Nursing Clinics                                                         |
| Permeability Properties of Plastics and Elastomers                                    |
| Personal Safety and Security Playbook                                                 |
| Perspectives in Medicine                                                              |
| Perspectives in Plant Ecology, Evolution and Systematics                              |
| Perspectives on Behavior Science                                                      |
| Pervasive and Mobile Computing                                                        |
| Pharmaceuticals and Personal Care Products: Waste Management and Treatment Technology |
| PharmacoEconomics - Open                                                              |
| Pharmacology & Therapeutics                                                           |
| Philosophy of Technology and Engineering Sciences                                     |
| Philosophy, Ethics, and Humanities in Medicine                                        |
| Photonic Network Communications                                                       |
| Photoshop CS3 Essential Skills                                                        |
| Photovoltaics Bulletin                                                                |
| Physical Medicine and Rehabilitation Clinics of North America                         |
| Physical Techniques in the Study of Art, Archaeology and Cultural Heritage            |
| Physical and Engineering Sciences in Medicine                                         |
| Physical and Logical Security Convergence                                             |
| Physics in Perspective                                                                |
| Physics of Particles and Nuclei                                                       |
| Pneumonia                                                                             |
| Polyurethane Polymers                                                                 |
| Population Research and Policy Review                                                 |
| Porous Silicon for Biomedical Applications                                            |
| Power Plant Instrumentation and Control Handbook                                      |
| Practical Electrical Equipment and Installations in Hazardous Areas                   |
| Practical Fiber Optics                                                                |
| Practical Guide to Clinical Computing Systems                                         |
| Practical Power System and Protective Relays Commissioning                            |
| Practical Reservoir Engineering and Characterization                                  |
| Pramana                                                                               |
| Preventive Veterinary Medicine                                                        |
| Primary Care Diabetes                                                                 |
| Primer on the Autonomic Nervous System                                                |
| Principles and Applications of RF/Microwave in Healthcare and Biosensing              |

|                                                                                       |
|---------------------------------------------------------------------------------------|
| Principles and Practice of Clinical Research                                          |
| Principles of Addiction                                                               |
| Principles of Clinical Pharmacology                                                   |
| Principles of Measurement and Transduction of Biomedical Variables                    |
| Procedia - Social and Behavioral Sciences                                             |
| Procedia IUTAM                                                                        |
| Proceedings of the National Academy of Sciences, India Section B: Biological Sciences |
| Product Development                                                                   |
| Progress in Heterocyclic Chemistry                                                    |
| Progress in Natural Science                                                           |
| Project Finance in Theory and Practice                                                |
| Properties and Performance of Natural-Fibre Composites                                |
| Propulsion and Power Research                                                         |
| Psychological Research                                                                |
| Psychology in the Physical and Manual Therapies                                       |
| Psychopathologie transculturelle                                                      |
| Psychosocial Conceptual Practice Models in Occupational Therapy                       |
| Publishing Research Quarterly                                                         |
| Pulmonary Pharmacology & Therapeutics                                                 |
| Quality & Quantity                                                                    |
| Quality Control and Evaluation of Herbal Drugs                                        |
| Quaternary Research                                                                   |
| RF Engineering for Wireless Networks                                                  |
| Rabies                                                                                |
| Radiation Physics and Chemistry                                                       |
| Radio Frequency Transistors                                                           |
| Radioactivity                                                                         |
| Radiochemistry                                                                        |
| Railway Engineering Science                                                           |
| Rangeland Ecology & Management                                                        |
| Reaction Chemistry & Engineering                                                      |
| Real-Time UML Workshop for Embedded Systems                                           |
| Recent Advances in Thermo-Chemical Conversion of Biomass                              |
| Recent Developments in Applied Electrostatics                                         |
| Reconfigurable Computing                                                              |
| Redox Biology                                                                         |
| Reflow Soldering Processes                                                            |



|                                                                                 |
|---------------------------------------------------------------------------------|
| Regional Studies in Marine Science                                              |
| Regulatory Toxicology and Pharmacology                                          |
| Reproductive Health Matters                                                     |
| Res Publica                                                                     |
| Research Proposals                                                              |
| Research in Developmental Disabilities                                          |
| Research in Economics                                                           |
| Research in Higher Education                                                    |
| Research in Microbiology                                                        |
| Research in Organizational Behavior                                             |
| Research in Transportation Business & Management                                |
| Resonance                                                                       |
| Resource-Efficient Technologies                                                 |
| Respiratory Research                                                            |
| Results in Physics                                                              |
| Review of Evolutionary Political Economy                                        |
| Review of Quantitative Finance and Accounting                                   |
| Reviews in Fish Biology and Fisheries                                           |
| Reviews of Modern Plasma Physics                                                |
| Revista Española de Cardiología Suplementos                                     |
| Revista Española de Medicina Nuclear (English Edition)                          |
| Revista de Gastroenterología de México (English Edition)                        |
| Revista de Psicodidáctica (English ed.)                                         |
| Revue Européenne de Psychologie Appliquée/European Review of Applied Psychology |
| Revue Francophone d'Orthoptie                                                   |
| Revue Neurologique                                                              |
| Rice                                                                            |
| Rock Mechanics and Rock Engineering                                             |
| Rules of Thumb for Maintenance and Reliability Engineers                        |
| Russian Agricultural Sciences                                                   |
| Russian Engineering Research                                                    |
| Russian Journal of Coordination Chemistry                                       |
| SAE and the Evolved Packet Core                                                 |
| SN Computer Science                                                             |
| Sadhana                                                                         |
| Safety and Security Review for the Process Industries                           |
| Safety in Extreme Environments                                                  |

|                                                                                        |
|----------------------------------------------------------------------------------------|
| Scandinavian Journal of Trauma, Resuscitation and Emergency Medicine                   |
| Schizophrenia Research                                                                 |
| School Mental Health                                                                   |
| Scientia Iranica                                                                       |
| Scientific Phone Apps and Mobile Devices                                               |
| Security Informatics                                                                   |
| Security and Resilience in Intelligent Data-Centric Systems and Communication Networks |
| Semiconductor Gas Sensors                                                              |
| Seminars in Pediatric Infectious Diseases                                              |
| Sensors for Health Monitoring                                                          |
| Sexuality Research and Social Policy                                                   |
| Shock Waves                                                                            |
| Silicon Carbide Biotechnology                                                          |
| Silicon-On-Insulator (SOI) Technology                                                  |
| Simulation Modelling Practice and Theory                                               |
| Singapore Dental Journal                                                               |
| Sintering of Advanced Materials                                                        |
| Sleep Medicine                                                                         |
| Sleep and Breathing                                                                    |
| Small Wind                                                                             |
| Small-scale Forestry                                                                   |
| Smart Textiles and their Applications                                                  |
| Smart Things                                                                           |
| Smart Wheelchairs and Brain-Computer Interfaces                                        |
| Social Anxiety                                                                         |
| Social Choice and Welfare                                                              |
| Social Indicators Research                                                             |
| Sodium Sulfate                                                                         |
| Software Engineering for Embedded Systems                                              |
| Soil Biology and Biochemistry                                                          |
| Solar System Research                                                                  |
| Solid Waste Recycling and Processing                                                   |
| Solvent Extraction                                                                     |
| Somnologie                                                                             |
| Sony A300/A350                                                                         |
| South African Journal of Botany                                                        |
| Speedlights & Speedlites                                                               |

|                                                                               |
|-------------------------------------------------------------------------------|
| Sport Management Review                                                       |
| Sport, Recreation and Tourism Event Management                                |
| Sport-Orthopädie - Sport-Traumatologie - Sports Orthopaedics and Traumatology |
| Statistics and Computing                                                      |
| Statistics in Biosciences                                                     |
| Stem Cell Research & Therapy                                                  |
| Storyboards                                                                   |
| Structural Health Monitoring of Civil Infrastructure Systems                  |
| Studies in East European Thought                                              |
| Studies in History and Philosophy of Science Part A                           |
| Studies in Multidisciplinarity                                                |
| Studies in Philosophy and Education                                           |
| Superconductors in the Power Grid                                             |
| Supportive Care in Cancer                                                     |
| Surface Chemistry of Nanobiomaterials                                         |
| Surface Science Reports                                                       |
| Surfaces and Interfaces                                                       |
| Surgical Endoscopy And Other Interventional Techniques                        |
| Surgical and Experimental Pathology                                           |
| Sustainable Cities and Society                                                |
| Sustainable Design and Build                                                  |
| Sustainable Water and Wastewater Processing                                   |
| System                                                                        |
| System Requirements Analysis                                                  |
| Systems Microbiology and Biomanufacturing                                     |
| TOP                                                                           |
| Targeted Oncology                                                             |
| Tea in Health and Disease Prevention                                          |
| Technology in Society                                                         |
| Technology, Humans, and Society                                               |
| Technovation                                                                  |
| Tetraplegia and Paraplegia                                                    |
| Textiles in Automotive Engineering                                            |
| Thalassas: An International Journal of Marine Sciences                        |
| The American Journal of Geriatric Pharmacotherapy                             |
| The American Journal of Medicine                                              |
| The Arts in Psychotherapy                                                     |

|                                                                                       |
|---------------------------------------------------------------------------------------|
| The Assessment and Treatment of Addiction                                             |
| The Best Damn Cisco Internetworking Book Period                                       |
| The Biology of Human Longevity                                                        |
| The Case Manager                                                                      |
| The Cloud Security Ecosystem                                                          |
| The Concise Focal Encyclopedia of Photography                                         |
| The Effective Security Officer's Training Manual                                      |
| The Egyptian Journal of Neurology, Psychiatry and Neurosurgery                        |
| The European Physical Journal C                                                       |
| The European Physical Journal D                                                       |
| The Geneva Papers on Risk and Insurance - Issues and Practice                         |
| The Geochemical Society Special Publications                                          |
| The HLA FactsBook                                                                     |
| The IBOC Handbook                                                                     |
| The Joint Commission Journal on Quality and Safety                                    |
| The Journal of Arthroplasty                                                           |
| The Journal of Behavioral Health Services & Research                                  |
| The Journal of Foot and Ankle Surgery                                                 |
| The Journal of Hand Surgery: British & European Volume                                |
| The Journal of Heart and Lung Transplantation                                         |
| The Journal of Mathematical Neuroscience                                              |
| The Journal of Membrane Biology                                                       |
| The Journal of Prevention of Alzheimer's Disease                                      |
| The Journal of Primary Prevention                                                     |
| The Journal of Real Estate Finance and Economics                                      |
| The Journal of Steroid Biochemistry and Molecular Biology                             |
| The Journal of VLSI Signal Processing Systems for Signal, Image, and Video Technology |
| The Journal of Value Inquiry                                                          |
| The Journal of the American Dental Association                                        |
| The Journal of the Astronautical Sciences                                             |
| The Laboratory Fish                                                                   |
| The MPEG Handbook                                                                     |
| The Mobile Connection                                                                 |
| The Multibody Systems Approach to Vehicle Dynamics                                    |
| The Performance of Photovoltaic (PV) Systems                                          |
| The Principles of Experimental Research                                               |
| The Psychology of Serial Killer Investigations                                        |

|                                                                                                |
|------------------------------------------------------------------------------------------------|
| The ROV Manual                                                                                 |
| The Real Life Guide to Accounting Research                                                     |
| The SGTE Casebook                                                                              |
| The Science of Fitness                                                                         |
| The Urban Review                                                                               |
| Theoretical Computer Science                                                                   |
| Theoretical and Applied Climatology                                                            |
| Theory and Society                                                                             |
| Therapy in Sleep Medicine                                                                      |
| Thermochemica Acta                                                                             |
| Thermodynamics                                                                                 |
| Thermoforming of Single and Multilayer Laminates                                               |
| Thermoplastics and Thermoplastic Composites                                                    |
| Thermosets and Composites                                                                      |
| Toxicology Research                                                                            |
| Transactions of the Indian National Academy of Engineering                                     |
| Transfusion Medicine and Hemostasis                                                            |
| Translational Respiratory Medicine                                                             |
| Transplant International                                                                       |
| Transport Properties of Concrete                                                               |
| Transportation Research Part B: Methodological                                                 |
| Transportation Research Part E: Logistics and Transportation Review                            |
| Treatise on Estuarine and Coastal Science                                                      |
| Treatment of the Postmenopausal Woman                                                          |
| Trees                                                                                          |
| Trends in Food Science & Technology                                                            |
| Trends in Immunology                                                                           |
| Trends in Neuroscience and Education                                                           |
| Tribology Series                                                                               |
| Tribology and Interface Engineering Series                                                     |
| Türk Fizyoterapi ve Rehabilitasyon Dergisi/Turkish Journal of Physiotherapy and Rehabilitation |
| URBAN DESIGN International                                                                     |
| Underground Infrastructures                                                                    |
| Understanding Automotive Electronics                                                           |
| Urologic Surgical Pathology                                                                    |
| User Experience in the Age of Sustainability                                                   |
| User Modeling and User-Adapted Interaction                                                     |

|                                                                       |
|-----------------------------------------------------------------------|
| Vehicle Thermal Management Systems Conference and Exhibition (VTMS10) |
| Veterinary Immunology and Immunopathology                             |
| Veterinary Parasitology: Regional Studies and Reports                 |
| Vibrational Spectroscopy                                              |
| Video Journal and Encyclopedia of GI Endoscopy                        |
| Video Shooter                                                         |
| Virtual Reality                                                       |
| Vision Research                                                       |
| Vital                                                                 |
| WISC-V Assessment and Interpretation                                  |
| Waste Engine Oils                                                     |
| Waste Management                                                      |
| Water Resources Management                                            |
| Water, Air, & Soil Pollution: Focus                                   |
| Welded Design                                                         |
| Well Logging and Formation Evaluation                                 |
| Wide Bandgap Semiconductor Power Devices                              |
| Wills' Mineral Processing Technology                                  |
| Wine Science                                                          |
| World Development                                                     |
| World Development Perspectives                                        |
| World Journal of Pediatrics                                           |
| Zeitschrift für Vergleichende Politikwissenschaft                     |
| Zen and the Art of Information Security                               |
